# Supplementary material for: Cultivable marine fungi from the Arctic Archipelago of Svalbard and their antibacterial activity
Source: Mycology. 2019 Dec 27;11(3):230–42. doi: 10.1080/21501203.2019.1708492 (PMC7534220; doi:10.1080/21501203.2019.1708492)
Supplement: Supplemental Material [file TMYC_A_1708492_SM2306.xlsx]

## Sheet: Supplementary table 1
Object-ID	Station	Lat	Long	Depth (m)	Sampling type
1	951	76.1546	29.5158	5	CTD Surface Water
2	1287	73.3703	22.1299	462.32	Van Veen Grab Sampler
3	1312	76.4399	29.1451	254.76	Van Veen Grab Sampler
4	1318	77.2086	31.0014	190.92	Van Veen Grab Sampler
5	1358	80.0636	31.1217	71.47	Triangle dredge
6	1360	80.0801	31.2055	119.74	Triangle dredge
7	1373	80.2427	31.571	42.47	Triangle dredge
8	1386	79.1296	19.2868	0	Littoral zone
9	1404	79.3372	18.388	0	Littoral zone
10	1413	79.3973	19.4813	0	Littoral zone

## Sheet: Supplementary table 2
Primer	Sequence	Target	Length	Tm (ºC)	GC (%)	Ref
ITS5	5’-GGAAGTAAAAGTCGTAACAAGG-3’	ITS1-5.8S-ITS2	500+	52.4	40.9	(White et al. 1990)
ITS4	5’-TCCTCCGCTTATTGATATGC-3’			53.5	45.0	(White et al. 1990)
ITS3	5’-GCATCGATGAAGAACGCAGC-3’	ITS2	350	68.2	55.0	(White et al. 1990)
LR0Ri	5’-GCTTAAGTTCAGCGGGT-3’			57.9	52.9	Inverted sequence of LR0R
NS1	5’-GTAGTCATATGCTTGTCTC-3’	SSU (V1-V5)	1100	48.9	42.1	(White et al. 1990)
NS4	5’-CTTCCGTCAATTCCTTTAAG-3’			57.9	40.0	(White et al. 1990)
LR0R	5’-ACCCGCTGAACTTAAGC-3’	LSU (D1-D3)	900	57.9	52.9	(Rehner and Samuels 1994, Moncalvo, Wang, and Hseu 1995)
LR5	5’-TCCTGAGGGAAACTTCG-3’			58.8	52.9	(Vilgalys and Hester 1990)

## Sheet: Supplementary Table 3
OTU_clust.	Cruise	Isolate	Source	Kingdom	Division	Genus
1	M16HEL	1358A1-02	Algae	Fungi	Ascomycota	Lulworthiaceae
1	M16HEL	1373A1-20.1	Algae	Fungi	Ascomycota	Lulworthiaceae
2	M16HEL	1360D1-02.M	Driftwood	Fungi	Ascomycota	Tetracladium
3	M16HEL	1373A1-05.F2	Algae	Fungi	Ascomycota	Penicillium
3	M16HEL	1413A2-01	Algae	Fungi	Ascomycota	Penicillium
3	M16HEL	1360D1-12.2	Driftwood	Fungi	Ascomycota	Penicillium
3	M16HEL	Tra3202.IV.2	Fruiting Body	Fungi	Ascomycota	Penicillium
3	M16HEL	1287S1-05.2	Sediments	Fungi	Ascomycota	Penicillium
4	M16HEL	1360D1-09	Driftwood	Fungi	Ascomycota	Geomyces
4	M16HEL	1386D1-04.1	Driftwood	Fungi	Ascomycota	Geomyces
5	M16HEL	1360D1-16	Driftwood	Fungi	Ascomycota	Pseudorotium
6	M16HEL	1287S1-05.1.2	Sediments	Fungi	Ascomycota	Oidiodendron
7	M16HEL	1386A4-02	Algae	Fungi	Mucoromycota	Mortierella
7	M16HEL	1413A2-02	Algae	Fungi	Mucoromycota	Mortierella
7	M16HEL	1360D1-03.F	Driftwood	Fungi	Mucoromycota	Mortierella
7	M16HEL	Tra3202.III.2	Fruiting Body	Fungi	Mucoromycota	Mortierella
7	M16HEL	1287S1-05.1	Sediments	Fungi	Mucoromycota	Mortierella
8	M16HEL	1318S1-08	Sediments	Chromista	Oomycota	Oomycete
9	M16HEL	PIIIWF2.2.1	Water	Fungi	Ascomycota	Penicillium
10	M16HEL	1358A1-08.2	Algae	Fungi	Ascomycota	Lulworthiaceae
10	M16HEL	1373A1-03.F	Algae	Fungi	Ascomycota	Lulworthiaceae
11	M16HEL	1318S1-10	Sediments	Fungi	Ascomycota	Tolypocladium
12	M16HEL	1360D1-08	Driftwood	Fungi	Ascomycota	Acremonium
13	M16HEL	PVIWA5.2	Water	Fungi	Ascomycota	Penicillum
14	M16HEL	TRa3202.II.1	Fruiting Body	Fungi	Ascomycota	Lulworthia
15	M16HEL	1360D1-10.1	Driftwood	Fungi	Ascomycota	Mytilinidion
16	M16HEL	1360D1-09.1	Driftwood	Fungi	Ascomycota	Cosmospora
17	M16HEL	1404A1-01.1	Algae	Fungi	Basidiomycota	Glaciozyma
18	M16HEL	PVWE4.1	Water	Fungi	Mucoromycota	Mucor
19	M16HEL	1413A3-02	Algae	Fungi	Ascomycota	Lulworthiaceae
21	M16HEL	TRa3202.VI.1	Fruiting Body	Fungi	Ascomycota	Lulworthia
22	M16HEL	1312S1-05.2	Sediments	Chromista	Oomycota	Oomycete
23	M16HEL	1386A3-02	Algae	Fungi	Ascomycota	Tetracladium

## Sheet: Supplementary table 4
			Accession numbers				Closest genbank similarity (%)
OTU	Isolate_ID	Genus	18S rDNA	ITS	28S rDNA	Rfam	18S rDNA	ITS	28S rDNA
1	M16HEL1358A1-02	Lulworthiaceae sp. OTU1		MK543196	MK531712		na	85.6	98.9
2	M16HEL1360D1-02	Tetracladium sp. OTU2	MK531782	MK543198	MK531714		99.9	99.8	99.3
3	M16HEL1360D1-12.2	Penicillium sp. OTU3	MK531786	MK543203	MK531718		100	100	100
4	M16HEL1386D1-04.1	Geomyces sp. OTU4		MK543206	MK531720		na	100	100
5	M16HEL1360D1-16	Pseudorotium sp. OTU5	MK531787	MK543204	MK531719		100	100	100
6	M16HEL1287S1-05.1.2	Oidiodendron sp. OTU6	MK531778	MK543192	MK531709		99.4	99.8	98.4
7	M16HEL1360D1-03	Mortierella sp. OTU7	MK531783	MK543199	MK531715		99.9	99.8	97.8
8	M16HEL1318S1-08	Oomycete sp. OTU8	MK531779	MK543194	MK531710		98.2	79.1	89.6
9	M16HELPIIIWF2.2.1	Penicillium sp. OTU9	MK531773	MK543187	MK531704		100	100	100
10	M16HEL1358A1-08.2	Lulworthiaceae sp. OTU10	MK531781	MK543197	MK531713		98.1	83.4	98.7
11	M16HEL1318S1-10	Tolypocladium sp. OTU11	MK531780	MK543195	MK531711		99.7	95.1	98.8
12	M16HEL1360D1-08	Acremonium sp. OTU12		MK543200			na	99.8	na
13	M16HELPVIWA5.2	Penicillum sp. OTU13	MK531774	MK543188	MK531705		99.9	100	100
14	M16HELTRa3202.II.1	Lulworthia sp. OTU14	MK531776	MK543190	MK531707		98.9	82.9	94.2
15	M16HEL1360D1-10.1	Mytilinidion sp. OTU15	MK531785	MK543202	MK531717	RF00028	99.4	83.7	96.9
16	M16HEL1360D1-09.1	Cosmospora sp. OTU16	MK531784	MK543201	MK531716		100	100	99.1
17	M16HEL1404A1-01.1	Glaciozyma sp. OTU17	MK531789	MK543207	MK531721		99.5	98.7	97.5
18	M16HELPVWE4.1	Mucor sp. OTU18	MK531775	MK543189	MK531706		100	99.9	99.8
19	M16HEL1413A3-02	Lulworthiaceae sp. OTU19	MK531790	MK543208	MK531722		95.4	81.6	92.6
21	M16HELTRa3202.VI.1	Lulworthia sp. OTU21	MK531777	MK543191	MK531708		98.8	81.5	94.1
22	M16HEL1312S1-05.2	Oomycete sp. OTU22		MK543193			na	80.7	na
23	M16HEL1386A3-02	Tetracladium sp. OTU23	MK531788	MK543205		RF00028	99.9	99.2	na
		Missing locus	4	0	3

## Sheet: Supplementary table 5
Name	TYPE	18S	ITS	28S
Achlya bisexualis	FALSE		MH685199	MH685378
Achlya dubia	FALSE		HQ643093	AF119578
Achlya racemosa	FALSE		HQ643105	JX115214
Achlya radiosa	FALSE		HQ643106	JX115215
Acremonium cereale	FALSE		AB540571	AB540497
Acremonium persicinum TYPE	TRUE		NR_131260	AB540501
Atkinsiella dubia	FALSE	AB284575		AB285221
Cordyceps bifusispora	FALSE	HQ680636	AY245627
Cosmospora arxii TYPE	TRUE		NR_145062	NG_058892
Cosmospora coccinea	FALSE		FJ474072	GQ505990
Cosmospora meliopsicola	FALSE		HM054159	HM042406
Cosmospora viridescens TYPE	TRUE		NR_154791	NG_060412
Geomyces pannorum	FALSE		MH859889	MH871677
Geomyces sp. HL4PH	FALSE		KU612398	KU612427
Glaciozyma antarctica TYPE	TRUE		AF444529	NG_057664
Glaciozyma litoralis TYPE	TRUE		NR_155110	HF934009
Glaciozyma martinii TYPE	TRUE		NR_132821	NG_058293
Glaciozyma watsonii TYPE	TRUE		NR_155146	NG_058294
Gymnostellatospora japonica	FALSE		MF375781	MF375781
Haloguignardia irritans	FALSE	AY566252	AY581940
Leptolegnia caudata	FALSE	KP098370	KP098340	KP098357
Leuconeurospora pulcherrima	FALSE	AF096178	KJ755518	AF096193
Lophium mytilinum	FALSE	EF596818	EF596819	EF596819
Lulwoana sp. P3	FALSE		KY465973	KY486880
Lulwoana uniseptata TYPE	TRUE	AY879031	LC146746	LC146746
Lulworthia atlantica TYPE	TRUE		NR_148084	NG_060278
Lulworthia cf. opaca	FALSE	AY879003		AY878961
Lulworthia cf. purpurea	FALSE	KT347201	KT347219	JN886824
Lulworthia fucicola TYPE	TRUE	AY879007		AY878965
Lulworthia grandispora	FALSE	AF047582		AF047583
Lulworthia medusa	FALSE	AF195636		AF195637
Lulworthia sp. 107aIA	FALSE		KM272368	KM272360
Mortierella cystojenkinii TYPE	TRUE	HQ667504	NR_111581	NG_042564
Mortierella dichotoma TYPE	TRUE	HQ667477	NR_111568	NG_042552
Mortierella elongatula TYPE	TRUE	HQ667505	NR_111582	NG_042565
Mortierella fimbricystis TYPE	TRUE	GU559980	NR_152949	NG_057967
Mortierella indohii TYPE	TRUE	HQ667461	NR_111561	NG_042545
Mortierella turficola TYPE	TRUE	HQ667506	NR_111583	NG_042566
Mucor circinelloides TYPE	TRUE	JF723652	NR_126116	NG_055735
Mucor genevensis TYPE	TRUE	HM623319	NR_103632	NG_057971
Mucor plumbeus	FALSE	JN939014	JN942877	JN938896
Mucor racemosus TYPE	TRUE	JF723672	NR_126135	NG_055727
Mucor spinosus	FALSE	JF723692	JF723577	JF723763
Mytilinidion australe TYPE	TRUE		MH855533	NG_057806
Mytilinidion mytilinellum	FALSE	FJ161144	HM163570	FJ161184
Mytilinidion resinicola TYPE	TRUE	NG_016511	MH855535	NG_057807
Mytilinidion scolecosporum TYPE	TRUE	NG_016510	MH855536	NG_057808
Myxotrichum deflexum TYPE	TRUE	AB015777	NR_156338	NG_057619
Myxotrichum setosum	FALSE		MH857025	MH868555
Oidiodendron tenuissimum TYPE	TRUE	AB015787		AB040706
Oidiodendron truncatum	FALSE		MH858549	MH870187
Paracylindrocarpon aloicola TYPE	TRUE		NR_154346	NG_058238
Penicillium antarcticum TYPE	TRUE		NR_137880	MH874309
Penicillium bialowiezense TYPE	TRUE		NR_111323	MH866464
Penicillium brevicompactum TYPE	TRUE		KF465776	MH866525
Penicillium canescens	FALSE		MH856353	MH867903
Penicillium chrysogenum TYPE	TRUE		MH856357	MH867907
Penicillium commune TYPE	TRUE		NR_111143	MH867909
Penicillium coralligerum	FALSE		MH860682	MH872388
Penicillium crustosum	FALSE	JN939046	JN942857	JN938953
Penicillium granulatum	FALSE		MH865458	MH876918
Penicillium novae-zeelandiae TYPE	TRUE		NR_111668	MH867584
Penicillium osmophilum	FALSE	GU733358	MH860734	MH872446
Penicillium polonicum TYPE	TRUE	JN939264	NR_103687	JN939272
Penicillium sacculum TYPE	TRUE		NR_156551	MH869599
Penicillium solitum	FALSE		MH860945	MH872705
Phenoliferia psychrophenolica TYPE	TRUE	NG_061175	NR_154289	KY108774
Pseudeurotium bakeri TYPE	TRUE		NR_145345	MH872136
Pseudeurotium hygrophilum TYPE	TRUE	AY129282	NR_111128	MH874401
Pseudeurotium ovale TYPE	TRUE		MH857368	MH868913
Pseudeurotium zonatum TYPE	TRUE	AF096183	NR_111127	MH867318
Pseudocamaropycnis pini TYPE	TRUE		NR_153459	NG_058211
Roseodiscus rhodoleucus	FALSE	KT972703	KT972704	KT972705
Saprolegnia turfosa	FALSE		HQ644012	HQ665210
Tetracladium marchalianum	FALSE	EU883417	EU883417	EU883417
Tetracladium maxilliforme	FALSE	EU883429	EU883429	EU883429
Tetracladium psychrophilum	FALSE	JX029138	JX029129
Tolypocladium cylindrosporum TYPE	TRUE		MH859917	MH871712
Tolypocladium endophyticum	FALSE	KF747321	KF747245	KF747152
Tolypocladium inegoensis	FALSE		AB027368	AB027368
Tolypocladium inflatum TYPE	TRUE		MH859963	MH871762
Tolypocladium ophioglossoides	FALSE	AB027321	AB027367	AB027367
Tolypocladium pustulata	FALSE		AF389189	AF389190
Tolypocladium sp. ZLY-2010	FALSE		HM595510	HM595578
Zalerion maritima	FALSE	KT347203	KT347216	JN886806
Zalerion xylestrix	FALSE	EU848591		EU848592
Missing reference locus		44	7	3
